# Supplementary material for: Seagrass sediment organic carbon burial rates are globally significant
Source: Research Square preprint supplement (doi:10.21203/rs.3.rs-8462059/v1), 2026-01-06
Supplement: Supplementary file 1 [file 0676c8d9ce00398a6860ceec.xlsx]

## Sheet: Table_S4
code	country	bioregion	McKenzie_high_confidence_km2	McKenzie_low_confience_km2	updated_area_lower_limit_km2	updated_area_upper_limit_km2	used_area_km2	used_area_km2	source_McKenzie_et_al_2020	source_updated_area_and_notes	notes
ALB	Albania	Mediterranean	44.06		149.56		149.56	149.56	UNEP-WCMC and Short 2018	Traganos et al 2022a
DZA	Algeria	Mediterranean	40.56		167.91		167.91	167.91	UNEP-WCMC and Short 2018	Traganos et al 2022a
ASM	American Samoa	Tropical Indo-Pacific		381.14	1.18		1.18	381.14	National Geographic Society 2000	Allen Coral Atlas (2022)
AGO	Angola	Tropical Atlantic		596.67	600.5		600.5	600.5	National Geographic Society 2000	Bryan et al., 2020
AIA	Anguilla	Tropical Atlantic	13.7		32.73		32.73	32.73	UNEP-WCMC and Short 2018	Schill et al., 2021
ATG	Antigua and Barbuda	Tropical Atlantic	251.01		137.82		137.82	137.82	UNEP-WCMC and Short 2018	Schill et al., 2021
AUS	Ashmore and Cartier Islands (Aus.)	Tropical Indo-Pacific	5.75				5.75	5.75	Skewes et al., 1999
AUS	Australia	Tropical Indo-Pacific	74554.9		51000		51000	51000	Coles et al. 2009; McKenzie et al. 2014a; McKenzie et al. 2014b; McKenzie et al. 2016b;Carter et al. 2016;Carter et al. 2014;Carter and Rasheed 2016;Coppo et al. 2015;Saunders et al. 2015;Kelly and Chaffer 2012;Natura Consulting 2012;Hyland et al. 1989;Lucieer et al. 2017;Roelofs et al. 2005;Jimenez 2015	CSIRO (2015)
AUS	Christmas Island (Aus.)	Tropical Indo-Pacific							National Geographic Society 2000
AUS	Cocos (Keeling) Islands (Aus.)	Tropical Indo-Pacific	18.77		3		3	3	Williams 1994	Buckee et al., 2021
AUS	Australia (incl Jervis Bay Territory)	Southern Oceans	8433.59				8433.59	8433.59	Lucieer et al. 2017;NSW Marine Parks Authority 2010
AUS	Norfolk Island (Aus.)	Southern Oceans							no polygon data available
AZE	Azerbaijan	Mediterranean							no polygon data available
BHS	Bahamas	Tropical Atlantic	2250.51		57337	92524	57337	92524	UNEP-WCMC and Short 2018	Gallagher et al 2022_Schill et al., 2021
BHR	Bahrain	Tropical Indo-Pacific	365.98		591		656	953	UNEP-WCMC and Short 2018	Alkhuzaei et al, 2025
BGD	Bangladesh	Tropical Indo-Pacific							Kamal and Khan 2009; no polygon data
BRB	Barbados	Tropical Atlantic	90.17		0.09		0.09	0.09	UNEP-WCMC and Short 2018	Schill et al., 2021
ATF	Bassas da India	Tropical Indo-Pacific
BEL	Belgium	North Atlantic
BLZ	Belize	Tropical Atlantic		4847.84	2291.46		2291.46	4847.84	UNEP-WCMC and Short 2018	CZMAI et al 2022 (from WWF 2022)
BEN	Benin	Tropical Atlantic		1363.97	1358		1358	1363.97	National Geographic Society 2000	Bryan et al., 2020
BMU	Bermuda	Tropical Atlantic	16.25				16.25	16.25	Murdoch et al. 2007
BES	Bonaire, Sint Eustatius, and Saba (Neth.)	Tropical Atlantic	3.82				3.82	3.82	Christianen et al. 2018; Debrot et al. 2014; Dutch Caribbean Nature Alliance 2014
BIH	Bosnia and Herzegovina	Mediterranean			6.9		6.9	6.9		Traganos et al 2022a
BRA	Brazil	Tropical Atlantic		429.34	300		300	429.34	National Geographic Society 2000	Copertino et al. 2013
IOT	British Indian Ocean Territory	Tropical Indo-Pacific							no polygon data available
BRN	Brunei Darussalam	Tropical Indo-Pacific							no polygon data available
BGR	Bulgaria	Mediterranean	2.95		9.17		9.17	9.17	Deyanova et al. 2013	Berov et al., 2022
KHM	Cambodia	Tropical Indo-Pacific	338.14		229.8		229.8	229.8	UNEP 2007; Vibol 2008	Sudo et al., 2021
CMR	Cameroon	Tropical Atlantic
CAN	Canada	North Atlantic			418.96		67.0336	67.0336	no polygon data available	Guijarro-Sabaniel et al., 2024	Total area for Canada
CAN	Canada	North Pacific	645				351.926	351.926	CEC 2016
CPV	Cape Verde	Tropical Atlantic	2e-05		0.062		0.062	0.062	Creed et al. 2016	Mwikamba et al., 2024
CYM	Cayman Islands	Tropical Atlantic	63.9		85.42		85.42	85.42	DaCosta-Cottam et al. 2009	Schill et al., 2021
CHL	Chile	Southern Oceans	2				2	2	Green and Short 2003
CHL	Chile	Southern Oceans
CHN	China (Peoples Republic of)	North Pacific			260		39	39		Du et al. 2023	Total area for China
CHN	China (Peoples Republic of)	Tropical Indo-Pacific	79.444				221	221	Zheng et al. 2013
COL	Colombia	Tropical Atlantic	433.52		661		548.63	548.63	UNEP-WCMC and Short 2018	Diaz et al., 2003; Serrano et al., 2021	Total area for Colombia
COL	Colombia	Southern Oceans					112.37	112.37
COM	Comoros	Tropical Indo-Pacific	21.31	423.08			21.31	423.08	Poonian et al. 2016; UNEP-WCMC and Short 2018
COG	Congo (Democratic Republic)	Tropical Atlantic
COK	Cook Islands	Tropical Indo-Pacific
CRI	Costa Rica	Tropical Atlantic	0.16				0.16	0.16	Krupp et al. 2009; Samper-Villarreal et al. 2018
CIV	CÃ´te d'Ivoire (Ivory Coast)	Tropical Atlantic
HRV	Croatia	Mediterranean	299.66		2029.99		2029.99	2029.99	UNEP-WCMC and Short 2018	Traganos et al 2022a	Polygon is available but unpublished / from other resource
CUB	Cuba	Tropical Atlantic	16073		29501.2		29501.2	29501.2	Cerdeira-Estrada et al. 2008; Ventura DÃ­az and RodrÃ­guez Cueto 2012	Schill et al., 2021
CUW	CuraÃ§ao (Neth.)	Tropical Atlantic	8				8	8	Green and Short 2003
CYP	Cyprus	Mediterranean	70.04		44.45		44.45	44.45	UNEP-WCMC and Short 2018	Traganos et al 2022a	Polygon is available but unpublished / from other resource
DNK	Denmark	North Atlantic	1345		2204		2204	2204	Boström et al. 2014	Staehr et al., 2019
DJI	Djibouti	Tropical Indo-Pacific
DMA	Dominica	Tropical Atlantic	2.65		10.18		10.18	10.18	Steiner and Willette 2010	Schill et al., 2021
DOM	Dominican Republic	Tropical Atlantic		460.2	622.65		622.65	622.65	National Geographic Society 2000	Schill et al., 2021
ECU	Ecuador	Southern Oceans
EGY	Egypt	Mediterranean			2.96		2.96	2.96		Traganos et al 2022a
EGY	Egypt	Tropical Indo-Pacific		2202.62				2202.62	National Geographic Society 2000
SLV	El Salvador	Tropical Atlantic
GNQ	Equatorial Guinea	Tropical Atlantic
ERI	Eritrea	Tropical Indo-Pacific		3.13				3.13	National Geographic Society 2000
EST	Estonia	North Atlantic	155				155	155	Boström et al. 2014
ATF	Europa Island	Tropical Indo-Pacific
FLK	Falkland Islands (Islas Malvinas)	Southern Oceans
FRO	Faroe Islands	North Atlantic
FJI	Fiji	Tropical Indo-Pacific	38.36		500.76		500.76	500.76	de MaziÃ¨res 2008; Harborne et al. 2001; Koshy 2001; Phinn et al. 2012; Roelfsema et al. 2013b; Roelfsema and Phinn 2010; Waycott et al. 2011	McKenzie et al 2021
FIN	Finland	North Atlantic	30				30	30	Boström et al. 2014
FRA	France	North Atlantic	102.27				102.27	102.27	UNEP-WCMC and Short 2018
FRA	France	Mediterranean	936.69		787.9	900.28	787.9	900.28	UNEP-WCMC and Short 2018	Traganos et al 2022a; Holon et al., 2015	Full side scan/multibeam mapping, updated in 2021_mediterranean
GUF	French Guiana	Tropical Atlantic
PYF	French Polynesia	Tropical Indo-Pacific	28.7		1.69		1.69	1.69	Waycott et al. 2011	Allen Coral Atlas (2022)
GAB	Gabon	Tropical Atlantic
GMB	The Gambia	Tropical Atlantic			1.11		1.11	1.11	no polygon data available; seagrassspotter.org/sighting/2436	Cheikh et al., 2023
GEO	Georgia	Mediterranean
DEU	Germany	North Atlantic	163.3				163.3	163.3	Boström et al. 2014; Kolbe 2011
GHA	Ghana	Tropical Atlantic		2732.59	2718.58		2718.58	2732.59	National Geographic Society 2000; Ntiamoa-Baidu et al 1998	Bryan et al., 2020
GIB	Gibraltar	Mediterranean			4.2		4.2	4.2		Traganos et al 2022a
ATF	Glorioso Islands	Tropical Indo-Pacific
GRC	Greece	Mediterranean	411.41		2749.07		2749.07	2749.07	UNEP-WCMC and Short 2018; Gerakaris et al 2020	Panayotidis et al., 2022
GRL	Greenland	North Atlantic							no polygon data available Olesen et al. 2015
GRD	Grenada	Tropical Atlantic	7.09		33.15		33.15	33.15	UNEP-WCMC and Short 2018	Schill et al., 2021
GLP	Guadeloupe	Tropical Atlantic	82		159.57		159.57	159.57	Green and Short 2003	Schill et al., 2021
GUM	Guam	Tropical Indo-Pacific	3.07		5.2		5.2	5.2	NCCOS 2004	Allen Coral Atlas (2022)
GTM	Guatemala	Tropical Atlantic	4.81				4.81	4.81	Ballhorn et al. 2014
GGY	Guernsey	North Atlantic							no polygon data available; seagrassspotter.org/sighting/2940 & 2940
GIN	Guinea	Tropical Atlantic		12900.7	4.28		4.28	12900.7	National Geographic Society 2000	Mwikamba et al., 2024
GNB	Guinea-Bissau	Tropical Atlantic		15397.1	8.81		8.81	15397.1	National Geographic Society 2000; seagrassspotter.org/sighting/2491	Mwikamba et al., 2024
GUY	Guyana	Tropical Atlantic
HTI	Haiti	Tropical Atlantic		612.27	804.91		804.91	804.91	National Geographic Society 2000	Schill et al., 2021
HND	Honduras	Tropical Atlantic		2739.12				2739.12	National Geographic Society 2000
HKG	Hong Kong	Tropical Indo-Pacific	0.16				0.16	0.16	UNEP-WCMC and Short 2018; Fong 1998
ISL	Iceland	North Atlantic	5				5	5	Boström et al. 2014
ATF	Ile Saint-Paul	Southern Oceans
ATF	Iles Kerguelen	Southern Oceans
IND	India	Tropical Indo-Pacific	516.59				516.59	516.59	Geevarghese et al. 2018
IDN	Indonesia	Tropical Indo-Pacific	2934.64		2934.6		2934.6	2934.6	Sjafrie et al. 2018	Sudo et al., 2021
IRN	Iran (Islamic Republic of)	Tropical Indo-Pacific	2714.34				2714.34	2714.34	UNEP-WCMC and Short 2018
IRQ	Iraq	Tropical Indo-Pacific
IRL	Ireland	North Atlantic	17.1		165		165	165	Wilkes et al. 2017	Hastings et al., 2020	modelled with SDM at 1km pixel size
IMN	Isle of Man	North Atlantic							no polygon data available; seagrassspotter.org/sighting/2874
ISR	Israel	Mediterranean	15.32		10.43		10.43	10.43	UNEP-WCMC and Short 2018	Traganos et al 2022a
ISR	Israel	Tropical Indo-Pacific	2.13				2.13	2.13	UNEP-WCMC and Short 2018
ITA	Italy	Mediterranean	9030.58		3261.23		3261.23	3261.23	UNEP-WCMC and Short 2018	Traganos et al 2022a
JAM	Jamaica	Tropical Atlantic		781.16	425.47		425.47	781.16	National Geographic Society 2000	Schill et al., 2021
JPN	Japan	North Pacific	405.56				405.56	405.56	UNEP-WCMC and Short 2018
JPN	Japan (Ryukyu)	Tropical Indo-Pacific	69.01				69.01	69.01	UNEP-WCMC and Short 2018
JEY	Jersey	North Atlantic							no polygon data available; seagrassspotter.org/sighting/1259
JOR	Jordan	Tropical Indo-Pacific	1.37				1.37	1.37	UNEP-WCMC and Short 2018
ATF	Juan De Nova Island	Tropical Indo-Pacific
KAZ	Kazakhstan	Mediterranean							no polygon data available
KEN	Kenya	Tropical Indo-Pacific	113.22		679.6		679.6	679.6	UNEP-WCMC and Short 2018	Traganos et al 2022b
KIR	Kiribati	Tropical Indo-Pacific		277.86	2.76		2.76	277.86	National Geographic Society 2000	McKenzie et al 2021
PRK	Korea (North)	North Pacific							no polygon data available
KOR	Korea (South)	North Pacific	70				70	70	Green and Short 2003
KWT	Kuwait	Tropical Indo-Pacific		50				50	Erftemeijer and Shuail 2012
LVA	Latvia	North Atlantic							no polygon data available
LBN	Lebanon	Mediterranean			26.94		26.94	26.94	no polygon data available	Traganos et al 2022a
LBR	Liberia	Tropical Atlantic
LBY	Libya	Mediterranean	11.55		622.03		622.03	622.03	UNEP-WCMC and Short 2018	Traganos et al 2022a
LTU	Lithuania	North Atlantic							no polygon data available
MAC	Macau (China)	Tropical Indo-Pacific
MDG	Madagascar	Tropical Indo-Pacific		5793.46				5793.46	National Geographic Society 2000
MYS	Malaysia	Tropical Indo-Pacific	8.92		49		49	49	Bujang and Zakaria 2003; Orosco and Amir Sharifudeen 2004; Rajamani and Marsh 2015	Sudo et al., 2021
MDV	Maldives	Tropical Indo-Pacific	105	2378.99	105		105	2378.99	National Geographic Society 2000	Floyd et al., 2024
MLT	Malta	Mediterranean	70.56		29.4		29.4	29.4	UNEP-WCMC and Short 2018	Traganos et al 2022a
MHL	Marshall Islands	Tropical Indo-Pacific		510.7				510.7	National Geographic Society 2000
MTQ	Martinique	Tropical Atlantic	41		7273		7273	7273	Green and Short 2003	Schill et al., 2021
MRT	Mauritania	Tropical Atlantic			523		523	523	no polygon data available; seagrassspotter.org/sighting/2348	Cheikh et al., 2023
MUS	Mauritius	Tropical Indo-Pacific	30				30	30	Turner et al. 2000; Turner and Klaus 2005
MYT	Mayotte	Tropical Indo-Pacific		1275.26	7.6		7.6	1275.26	National Geographic Society 2000	Loricourt, 2005
MEX	Mexico	Tropical Atlantic	9577.38				9577.38	9577.38	UNEP-WCMC and Short 2018
MEX	Mexico	North Pacific
FSM	Micronesia (Federated States of)	Tropical Indo-Pacific	48.69		66.71		66.71	66.71	McKenzie and Rasheed 2006; Waycott et al. 2011	Allen Coral Atlas (2022)
MCO	Monaco	Mediterranean			0.41		0.41	0.41		Traganos et al 2022a
MNE	Montenegro	Mediterranean			146.62		146.62	146.62	no polygon data available	Traganos et al 2022a	Polygon is available but unpublished / from other resource
MSR	Montserrat	Tropical Atlantic	13.07		0.31		0.31	0.31	UNEP-WCMC and Short 2018	Schill et al., 2021
MAR	Morocco	Mediterranean			148.03		148.03	148.03	no polygon data available; seagrassspotter.org/sighting/1688	Traganos et al 2022a
MOZ	Mozambique	Tropical Indo-Pacific	727.95		1779.3		1779.3	1779.3	UNEP-WCMC and Short 2018	Traganos et al 2022b
MMR	Myanmar (Burma)	Tropical Indo-Pacific	4.26		4.3		4.3	4.3	Soe-Htun et al. 2015	Sudo et al., 2021
NAM	Namibia	Tropical Atlantic
NAM	Namibia	Southern Oceans
NRU	Nauru	Tropical Indo-Pacific
NLD	Netherlands	North Atlantic	2.76		10	20	10	20	UNEP-WCMC and Short 2018	PRW 2015; Tamis and Foekema, 2015
ANT	Netherlands Antilles	Tropical Atlantic	112.39				112.39	112.39	UNEP-WCMC and Short 2018
NCL	New Caledonia	Tropical Indo-Pacific	936		522.2		522.2	522.2	Waycott et al. 2011	Allen Coral Atlas (2022)
NZL	New Zealand	Southern Oceans	294				294	294	Anderson et al. 2019
NIC	Nicaragua	Tropical Atlantic		5565.56				5565.56	National Geographic Society 2000
NGA	Nigeria	Tropical Atlantic		8876.87	8844.95		8844.95	8876.87	National Geographic Society 2000	Bryan et al., 2020
NIU	Niue	Tropical Indo-Pacific
MNP	Northern Mariana Islands	Tropical Indo-Pacific	6.7		2.48		2.48	2.48	Waycott et al. 2011	Allen Coral Atlas (2022)
NOR	Norway	North Atlantic	66.37		90		90	90	Boström et al. 2014	Frigstad et al., 2021
OMN	Oman	Tropical Indo-Pacific							no polygon data available
PAK	Pakistan	Tropical Indo-Pacific
PLW	Palau	Tropical Indo-Pacific	79.98		74.97		74.97	74.97	Battista et al. 2007	Allen Coral Atlas (2022)
PAN	Panama	Tropical Atlantic		1802.12				1802.12	National Geographic Society 2000
PNG	Papua New Guinea	Tropical Indo-Pacific	117.2		1092.5		1092.5	1092.5	Waycott et al. 2011	Allen Coral Atlas (2022)
XPF	Paracel Islands	Tropical Indo-Pacific
PER	Peru	Southern Oceans
PHL	Philippines	Tropical Indo-Pacific	978		82.1		82.1	82.1	Fortes 2008	Sudo et al., 2021
PCN	Pitcairn Islands	Tropical Indo-Pacific
POL	Poland	North Atlantic	2.65				2.65	2.65	UNEP-WCMC and Short 2018
PRT	Portugal	North Atlantic	16.91				16.91	16.91	Cunha et al. 2014
PRT	Portugal	Mediterranean
PRI	Puerto Rico	Tropical Atlantic	603.92		394.77		394.77	394.77	UNEP-WCMC and Short 2018	Schill et al., 2021
QAT	Qatar	Tropical Indo-Pacific		1323.75	10.4		10.4	1323.75	UNEP-WCMC and Short 2018	Butler et al., 2020
REU	Reunion	Tropical Indo-Pacific	0.01				0.01	0.01	Cuvillier et al. 2017
ROU	Romania	Mediterranean							no polygon data available
RUS	Russian Federation	North Atlantic
RUS	Russian Federation	Mediterranean	472.1				472.1	472.1	UNEP-WCMC and Short 2018
RUS	Russian Federation	North Pacific	20.1				20.1	20.1	NOWPAP CEARAC 2018; UNEP-WCMC and Short 2018
SHN	Saint Helena, Ascension and Tristan da Cunha	Tropical Atlantic
KNA	Saint Kitts and Nevis	Tropical Atlantic	60.42		30.4		30.4	30.4	UNEP-WCMC and Short 2018	Schill et al., 2021
LCA	Saint Lucia	Tropical Atlantic	6.65		13.62		13.62	13.62	UNEP-WCMC and Short 2018	Schill et al., 2021
SPM	Saint Pierre and Miquelon	North Atlantic
VCT	Saint Vincent and the Grenadines	Tropical Atlantic	3.2		26.33		26.33	26.33	UNEP-WCMC and Short 2018	Schill et al., 2021
MAF	Saint-Martin & Saint BarthÃ©lemy	Tropical Atlantic	65.26		20.03		20.03	20.03	Hily et al. 2010; Jadot 2016	Schill et al., 2021
WSM	Samoa	Tropical Indo-Pacific		734.12	14.34		14.34	734.12	National Geographic Society 2000	Allen Coral Atlas (2022)
STP	Sao Tomé and Prí­ncipe	Tropical Atlantic			15		15	15	no polygon data available; Alexandre et al 2017	Alexandre et al 2017
SAU	Saudi Arabia	Tropical Indo-Pacific		370				370	Erftemeijer and Shuail 2012
SEN	Senegal	Tropical Atlantic		1490.78	83.72		83.72	1490.78	National Geographic Society 2000; Cunha and AraÃºjo 2009	Cheikh et al., 2023
SYC	Seychelles	Tropical Indo-Pacific			1421		1421	1421	no polygon data available	Rowlands et al. 2024
SLE	Sierra Leone	Tropical Atlantic		4445.62	0.154		0.154	4445.62	National Geographic Society 2000	Cheikh et al., 2023
SGP	Singapore	Tropical Indo-Pacific	0.337		2		2	2	Yaakub et al. 2013	Sudo et al., 2021
SXM	Sint Maarten (Neth.)	Tropical Atlantic	27.34				27.34	27.34	UNEP-WCMC and Short 2018
SVN	Slovenia	Mediterranean	0.08		0.00021		0.00021	0.00021	UNEP-WCMC and Short 2018	Traganos et al 2022a
SLB	Solomon Islands	Tropical Indo-Pacific	78.96		506.3		506.3	506.3	McKenzie et al. 2016a; Roelfsema et al. 2013a	Allen Coral Atlas (2022)
SOM	Somalia	Tropical Indo-Pacific							no polygon data available
ZAF	South Africa	Southern Oceans	381.03		8.2		8.2	8.2	UNEP-WCMC and Short 2018	Adams 2016	from estuaries only
ZAF	South Africa	Southern Oceans
ESP	Spain	Mediterranean	2759.31		1480.88		1480.88	1480.88	UNEP-WCMC and Short 2018	Traganos et al 2022a
XPG	Spratly Islands	Tropical Indo-Pacific
LKA	Sri Lanka	Tropical Indo-Pacific	1404.06		371.37		371.37	371.37	Pernetta 1993; Weerakkody and Suranjan 2018	Udagedara et al., 2020
SDN	Sudan	Tropical Indo-Pacific		4424.63				4424.63	National Geographic Society 2000
SUR	Suriname	Tropical Atlantic
SWE	Sweden	North Atlantic	18.25		1550		1550	1550	Baden et al. 2003	Huber et al., 2022
SYR	Syrian Arab Republic	Mediterranean			0		0	0	no polygon data available	Traganos et al 2022a
TWN	Taiwan (China)	Tropical Indo-Pacific	11.85		68.2		68.2	68.2	Huang et al. 2015; Lin et al. 2005; Yang et al. 2002	Sudo et al., 2021
TZA	Tanzania, United Republic of	Tropical Indo-Pacific	46.07		2817		2817	2817	UNEP-WCMC and Short 2018	Lugendo et al., 2024
THA	Thailand	Tropical Indo-Pacific	255.73		189.9		189.9	189.9	Marine and Mangrove Research and Development Center 2015	Sudo et al., 2021
TLS	Timor-Leste	Tropical Indo-Pacific	42.66		19		19	19	Boggs et al. 2012; Joyce 2013	Sudo et al., 2021
TGO	Togo	Tropical Atlantic		188.89	188.04		188.04	188.89	National Geographic Society 2000	Bryan et al., 2020
TKL	Tokelau	Tropical Indo-Pacific			0.11		0.11	0.11		Allen Coral Atlas (2022)
TON	Tonga	Tropical Indo-Pacific		2991.52	22.9		22.9	2991.52	National Geographic Society 2000	Allen Coral Atlas (2022)
TTO	Trinidad and Tobago	Tropical Atlantic	1.12				1.12	1.12	UNEP-WCMC and Short 2018
ATF	Tromelin Island	Tropical Indo-Pacific
TUN	Tunisia	Mediterranean		5000.62	6369.05		6369.05	6369.05	UNEP-WCMC and Short 2018	Traganos et al 2022a
TUR	Turkey	Mediterranean	2.31		740.59		740.59	740.59	UNEP-WCMC and Short 2018	Traganos et al 2022a
TKM	Turkmenistan	Mediterranean							no polygon data available
TCA	Turks and Caicos Islands	Tropical Atlantic	489.12		1977.88		1977.88	1977.88	UNEP-WCMC and Short 2018	Schill et al., 2021
TUV	Tuvalu	Tropical Indo-Pacific			0.01		0.01	0.01	no polygon data available	Allen Coral Atlas (2022)
UKR	Ukraine	Mediterranean		5861.58				5861.58	UNEP-WCMC and Short 2018
ARE	United Arab Emirates	Tropical Indo-Pacific	1026.37		2950		2950	2950	EAD 2017; Erftemeijer and Shuail 2012	Al-Mansoori et al., 2023
GBR	United Kingdom of Great Britain and Northern Ireland	North Atlantic	131.58		84.93		84.93	84.93	UNEP-WCMC and Short 2018	Green et al., 2021
UMI	United States Minor Outlying Islands	Tropical Indo-Pacific		487.16				487.16	National Geographic Society 2000
USA	United States of America	North Atlantic	1173.23				1173.23	1173.23	UNEP-WCMC and Short 2018
USA	United States of America	Tropical Atlantic	12524.2				12524.2	12524.2	UNEP-WCMC and Short 2018
USA	United States of America	North Pacific	724.9				724.9	724.9	Sherman and DeBruyckere 2018; UNEP-WCMC and Short 2018
USA	United States of America (Hawaii)	Tropical Indo-Pacific	0.02				0.02	0.02	BAE Systems 2007
VUT	Vanuatu	Tropical Indo-Pacific		1100.44	29.97		29.97	1100.44	National Geographic Society 2000	Allen Coral Atlas (2022)
VEN	Venezuela (Bolivarian Republic of)	Tropical Atlantic	1272.42				1272.42	1272.42	UNEP-WCMC and Short 2018
VNM	Viet Nam	Tropical Indo-Pacific	157.45		157.5		157.5	157.5	Green and Short 2003; Luong et al. 2012	Sudo et al., 2021
VGB	Virgin Islands (British)	Tropical Atlantic	39.91		61.16		61.16	61.16	Lorde 2011; Tyllianakis et al 2019	Schill et al., 2021
VIR	Virgin Islands (USA)	Tropical Atlantic	84.09		69.88		69.88	69.88	UNEP-WCMC and Short 2018	Schill et al., 2021
WLF	Wallis and Futuna	Tropical Indo-Pacific	24.3		1.45		1.45	1.45	Waycott et al. 2011	Allen Coral Atlas (2022)
ESH	Western Sahara	Tropical Atlantic
ESH	Western Sahara	Mediterranean							no polygon data available
YEM	Yemen	Tropical Indo-Pacific		5354.26				5354.26	UNEP-WCMC and Short 2018
URY	Uruguay	Southern Oceans			150		39.2824	39.2824		Copertino et al. 2013
BRA	Brazil	Southern Oceans					71.4	71.4		Copertino et al. 2013
ARG	Argentina	Southern Oceans	1				39.2376	39.2376	Green and Short 2003	Copertino et al. 2013
	TOTAL						247706	366379

## Sheet: data_source_updated_area
Source	Full reference
Adams 2016	Adams, J. B. (2016). Distribution and status of Zostera capensis in South African estuaries—a review. South African Journal of Botany, 107, 63-73.
Alexandre et al 2017	Alexandre, A., Silva, J., Ferreira, R., Paulo, D., Serrão, E. A., & Santos, R. (2017). First description of seagrass distribution and abundance in São Tomé and Príncipe. Aquatic Botany, 142, 48-52.
Alkhuzaei et al, 2025	Alkhuzaei, M., Brolly, M. Remote Sensing-Based Estimation of Below-Ground Sediment Carbon in Seagrass Habitats of Bahrain Waters. Remote Sens Earth Syst Sci 8, 1084–1101 (2025). https://doi.org/10.1007/s41976-025-00239-y
Allen Coral Atlas (2022)	Allen Coral Atlas (2022). Imagery, maps and monitoring of the world's tropical coral reefs. doi.org/10.5281/zenodo.3833242
Al-Mansoori et al., 2023	Al-Mansoori, N., Das, H.S. (2024). Seagrasses of the United Arab Emirates. In: Burt, J.A. (eds) A Natural History of the Emirates. Springer, Cham. https://doi.org/10.1007/978-3-031-37397-8_9
Berov et al., 2022	Berov, D., Klayn, S., Deyanova, D., & Karamfilov, V. (2022). Current distribution of Zostera seagrass meadows along the Bulgarian Black Sea coast (SW Black Sea, Bulgaria)(2010-2020). Biodiversity data journal, 10, e78942.
Bryan et al., 2020	Bryan, T., Virdin, J., Vegh, T., Kot, C. Y., Cleary, J., & Halpin, P. N. (2020). Blue carbon conservation in West Africa: A first assessment of feasibility. Journal of Coastal Conservation, 24(1), 8.
Buckee et al., 2021	Buckee, J., Hetzel, Y., Nyegaard, M., Evans, S., Whiting, S., Scott, S., ... & Verduin, J. (2021). Catastrophic loss of tropical seagrass habitats at the Cocos (Keeling) Islands due to multiple stressors. Marine Pollution Bulletin, 170, 112602.
Butler et al., 2020	Butler, J. D., Purkis, S. J., Yousif, R., Al-Shaikh, I., & Warren, C. (2020). A high-resolution remotely sensed benthic habitat map of the Qatari coastal zone. Marine pollution bulletin, 160, 111634.
Cheikh et al., 2023	Sidi Cheikh, M. A., Bandeira, S., Soumah, S., Diouf, G., Diouf, E. M., Sanneh, O., ... & Potouroglou, M. (2023). Seagrasses of West Africa: New discoveries, distribution limits and prospects for management. Diversity, 15(1), 5.
CSIRO (2015)	CSIRO (2015): Seagrass Dataset - CAMRIS. v1. CSIRO. Data Collection. 10.4225/08/5514852027A1E
CZMAI et al 2022 (from WWF 2022)	Seagrass conservation and protection in Belize. Guidelines for management, conservation and protection. World Wildlife Fund (WWF Mesoamerica) 2022
Diaz et al., 2003	Díaz, J. M., & Gómez López, D. I. (2003). HISTORIC CHANGES IN THE ABUNDANCE AND DISTRIBUTION OF SEAGRASS BEDS IN THE CARTAGENA BAY AND NEIGHBORING AREAS (COLOMBIA). Boletín de Investigaciones Marinas y Costeras-INVEMAR, 32(1), 57-74.
Du et al. 2023	Du, J., Chen, B., Nagelkerken, I., Chen, S., & Hu, W. (2023). Protect seagrass meadows in China’s waters. Science, 379(6631), 447-447.
Floyd et al., 2024	Floyd, M., East, H. K., Traganos, D., Musthag, A., Guest, J., Hashim, A. S., ... & Suggitt, A. J. (2024). Rapid seagrass meadow expansion in an Indian Ocean bright spot. Scientific Reports, 14(1), 10879.
Frigstad et al., 2021	Frigstad, H., Gundersen, H., Andersen, G. S., Borgersen, G., Kvile, K. Ø., Krause-Jensen, D., ... & Hancke, K. (2021). Blue Carbon–climate adaptation, CO2 uptake and sequestration of carbon in Nordic blue forests: Results from the Nordic Blue Carbon Project​. Nordic Council of Ministers.
Gallagher et al 2022	Gallagher, A. J., Brownscombe, J. W., Alsudairy, N. A., Casagrande, A. B., Fu, C., Harding, L., ... & Duarte, C. M. (2022). Tiger sharks support the characterization of the world’s largest seagrass ecosystem. Nature Communications, 13(1), 6328.
Green et al., 2021	Green, A. E., Unsworth, R. K., Chadwick, M. A., & Jones, P. J. (2021). Historical analysis exposes catastrophic seagrass loss for the United Kingdom. Frontiers in plant science, 12, 629962.
Guijarro-Sabaniel et al., 2024	Guijarro-Sabaniel, J., Thomson, J. A., Vercaemer, B., & Wong, M. C. (2024). National Eelgrass Task Force (NETForce): Building a dynamic, open eelgrass map for Canada. Science Branch, Maritimes Region, Coastal Ecosystem Science Division, Fisheries and Oceans Canada.
Hastings et al., 2020	Hastings, R., Cummins, V., & Holloway, P. (2020). Assessing the impact of physical and anthropogenic environmental factors in determining the habitat suitability of seagrass ecosystems. Sustainability, 12(20), 8302.
Holon et al., 2015	Holon, F., Mouquet, N., Boissery, P., Bouchoucha, M., Delaruelle, G., Tribot, A. S., & Deter, J. (2015). Fine-scale cartography of human impacts along French Mediterranean coasts: a relevant map for the management of marine ecosystems. PLoS One, 10(8), e0135473.
Copertino et al. 2013	Copertino, M. S., Creed, J. C., Lanari, M. O., Magalhães, K., Barros, K., Lana, P. C., ... & Horta, P. A. (2013). Seagrass distribution across Brazilan coast. International Blue Carbon Scientific Working Group
Huber et al., 2021	Silvia Huber, Lars B. Hansen, Lisbeth T. Nielsen, Mikkel L. Rasmussen, Jonas Sølvsteen, Johnny Berglund, Carlos Paz von Friesen, Magnus Danbolt, Mats Envall, Eduardo Infantes, Per Moksnes, Novel approach to large‐scale monitoring of submerged aquatic vegetation: A nationwide example from Sweden, Integrated Environmental Assessment and Management, Volume 18, Issue 4, 1 June 2022, Pages 909–920, ht…
Loricourt, 2005	Loricourt A 2005. Etude des herbiers à phanérogames marines à Mayotte [Study of seagrass meadows in Mayotte] [Master thesis]. France: Université de Pau et des Pays de l’Adour.
Lugendo et al., 2023	Lugendo, B., Wegoro, J., Shaghude, Y., Pamba, S., Makemie, M., & Hollander, J. (2024). Seagrass mapping across the coast of Tanzania. Ocean & Coastal Management, 253, 107169.
McKenzie et al 2021	McKenzie, L. J., Yoshida, R. L., Aini, J. W., Andréfouet, S., Colin, P. L., Cullen-Unsworth, L. C., ... & Unsworth, R. K. (2021). Seagrass ecosystems of the Pacific Island Countries and Territories: A global bright spot. Marine Pollution Bulletin, 167.
Mwikamba et al., 2024	Mwikamba, E.M., Githaiga, M.N., Briers, R.A. et al. A Review of Seagrass Cover, Status and Trends in Africa. Estuaries and Coasts 47, 917–934 (2024). https://doi.org/10.1007/s12237-024-01348-5
Panayotidis et al., 2022	Panayotidis, P., Papathanasiou, V., Gerakaris, V., Fakiris, E., Orfanidis, S., Papatheodorou, G., ... & Loukaidi, V. (2022). Seagrass meadows in the Greek Seas: presence, abundance and spatial distribution. Botanica Marina, 65(4), 289-299.
PRW 2015	PRW (2015): Vestigingsmogelijkheden voor litoraal zeegras in de Waddenzee. Programma voor een Rijke Waddenzee. Downloaded on September 11, 2015 at: http://www.rijkewaddenzee.nl/assets/pdf/dossiers/natuur-enlandschap/Zeegras%20NL%20Folmer%20PRW.pdf
Rowlands et al 2024	Rowlands, G.P.; Antat, S.; Baez, S.K.; Cupidon, A.; Faure, A.; Harlay, J.; Lee, C.B.; Martin, L.E.C.; Masque, P.; Morgan, M.; et al. The Seychelles Seagrass Mapping and Carbon Assessment. A report to be submitted to the Government of Seychelles, Ministry of Agriculture, Climate Change and Environment (MACCE). 2024
Schill et al., 2021	Schill, S. R., McNulty, V. P., Pollock, F. J., Lüthje, F., Li, J., Knapp, D. E., ... & Asner, G. P. (2021). Regional high-resolution benthic habitat data from planet dove imagery for conservation decision-making and marine planning. Remote Sensing, 13(21), 4215.
Serrano et al., 2021	Serrano, O., Gómez-López, D. I., Sánchez-Valencia, L., Acosta-Chaparro, A., Navas-Camacho, R., González-Corredor, J., ... & Marbà, N. (2021). Seagrass blue carbon stocks and sequestration rates in the Colombian Caribbean. Scientific Reports, 11(1), 11067.
Staehr et al., 2019	Staehr, P. A., Göke, C., Holbach, A. M., Krause-Jensen, D., Timmermann, K., Upadhyay, S., & Ørberg, S. B. (2019). Habitat model of eelgrass in Danish coastal waters: Development, validation and management perspectives. Frontiers in Marine Science, 6, 175.
Sudo et al., 2021	Sudo, K., Quiros, T. A. L., Prathep, A., Luong, C. V., Lin, H. J., Bujang, J. S., ... & Nakaoka, M. (2021). Distribution, temporal change, and conservation status of tropical seagrass beds in Southeast Asia: 2000–2020. Frontiers in Marine Science, 8, 637722.
Tamis and Foekema, 2015	Tamis, J.E. & Foekema, E.M., 2015. A review of blue carbon in the Netherlands. IMARES Report C151/15
Traganos et al 2022a	Traganos, D., Lee, C. B., Blume, A., Poursanidis, D., Čižmek, H., Deter, J., ... & Reinartz, P. (2022). Spatially explicit seagrass extent mapping across the entire Mediterranean. Frontiers in marine science, 9, 871799.
Traganos et al 2022b	Traganos, D., Pertiwi, A. P., Lee, C. B., Blume, A., Poursanidis, D., & Shapiro, A. (2022). Earth observation for ecosystem accounting: spatially explicit national seagrass extent and carbon stock in Kenya, Tanzania, Mozambique and Madagascar. Remote Sensing in Ecology and Conservation, 8(6), 778-792.
Udagedara et al., 2020	Udagedara, S., & Dahanayaka, D. D. G. L. (2020). Current status and checklist of seagrass in Sri Lanka. International Journal of Aquatic Biology, 8(5), 317-326.
