# Supplementary material for: Seagrass sediment organic carbon burial rates are globally significant
Source: Research Square preprint supplement (doi:10.21203/rs.3.rs-8462059/v1), 2026-01-06
Supplement: Supplementary file 2 [file 2bcb5c930d75887b2e0ef52f.docx]

**Supporting Information for:**

**Seagrass sediment organic carbon burial rates are globally significant**

Ariane Arias-Ortiz1*, Anna Lafratta2, Phil Colarusso3, James W. Fourqurean4,5, Chuancheng Fu6, Hilary Kennedy7, Johannes R. Krause4, Paul S. Lavery2, Carmen Leiva-Dueñas8, Nuria Marbà9, Miguel A. Mateo2,10, Inés Mazarrasa11, Dimitris Poursanidis12, Cristian Salinas2, Oscar Serrano10, Milica Stankovic13, 14, Nerea Piñeiro15, Axel Werner2, Marlene Wesselmann2, Carlos M. Duarte6,Jordi Garcia-Orellana1,Pere Masqué2

1Department de Física, Universitat Autonoma de Barcelona, Bellaterra, 08193 Barcelona, Spain

2School of Science & Centre for Marine Ecosystems Research, Edith Cowan University, Joondalup WA 6027, Australia.

3United States Environmental Protection Agency, Boston, Massachusetts 02109, USA.

4 Institute of Environment, Florida International University, 11200 SW 8th St, Miami, FL 33199, USA

5 Department of Biological Sciences, Florida International University, 11200 SW 8th St, Miami, FL 33199, USA

6 Marine Science Program, Biological and Environmental Science and Engineering Division (BESE), King Abdullah University of Science and Technology (KAUST), Thuwal 23955-6900, Saudi Arabia.

7School of Ocean Sciences, Bangor University, Menai Bridge, Wales, UK

8Department of Ecoscience, Aarhus University, C.F. Møllers Allé, building 1131, DK-8000 Aarhus, Denmark

9Global Change Research Group, IMEDEA (CSIC-UIB) Institut Mediterrani d’Estudis Avançats, Miquel Marqués 21, 07190 Esporles, (Spain)

10Centre for Advanced Studies of Blanes, Spanish Council for Scientific Research, 17300 Blanes, Spain.

11IH Cantabria, Instituto de Hidráulica Ambiental de la Universidad de Cantabria C/. Isabel Torres, 15, 39011 Santander, Cantabria

12 Foundation for Research and Technology—Hellas (FORTH), Institute of Applied and Computational Mathematics, N. Plastira 100, Vassilika Vouton, 70013 Heraklion, Greece

13Excellenece Center for Biodiversity of Peninsular Thailand, Faculty of Science, Prince of Songkla University, Hat Yai, Songkhla 90110, Thailand

14Dugong and Seagrass Research Station, Faculty of Science,Prince of Songkla University, Hat Yai, Songkhla, 90110, Thailand

15Centro de Investigacions Mariñas, Departamento de Xeocencias Mariñas e Ordenación do Territorio, Universidad de Vigo, Vigo, Spain.

Correspondence: Ariane Arias-Ortiz ([ariane.arias@uab.cat)](mailto:ariane.arias@uab.cat))

**Figures**

**
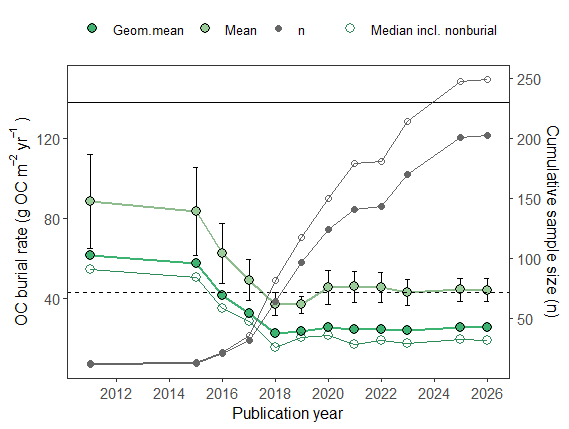
**

**Figure S1.** Summary statistics for direct organic carbon (OC) burial rates in seagrass sediments by publication year. Solid symbols represent statistics for seagrass cores showing net positive accumulation, while open symbols include the same stats for both depositional and non-depositional seagrass sediments. Horizontal lines indicate the IPCC Tier 1 estimate (dashed) and the mean OC burial rate reported by McLeod et al. (2011) (solid).

**
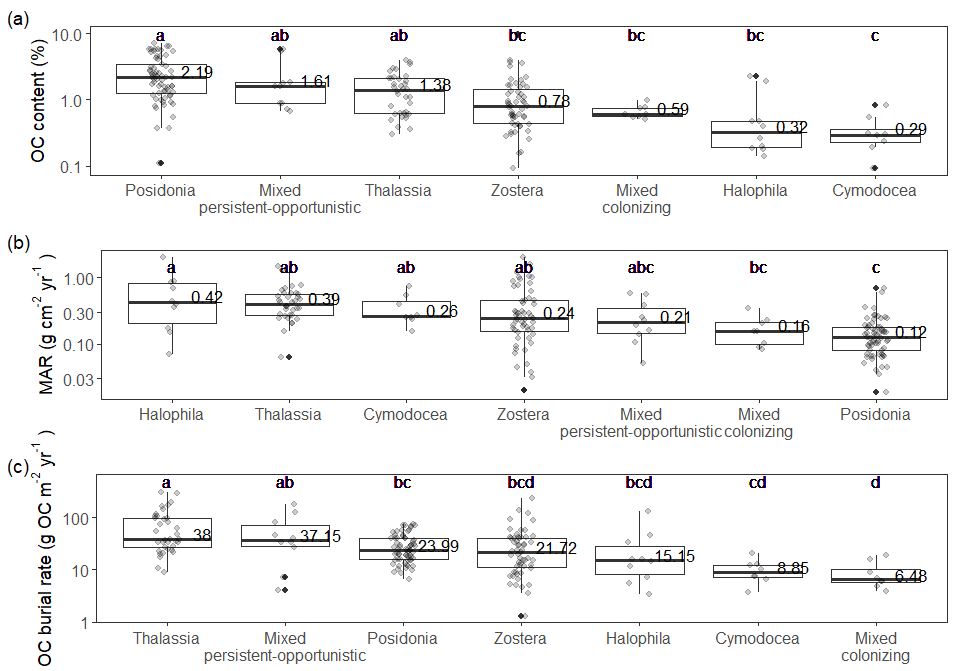
**

**Figure S2**. (a) Sediment organic carbon (OC) content in the dated sediment column (b) mass accumulation rates (c) and OC burial rates grouped by seagrass genus. Genus containing less than 5 observations are not shown. Boxes show the interquartile range, horizontal lines indicate the median, and whiskers extend to 1.5 times the IQR, individual data points are overlaid. Solid dark data points represent outliers and values on the box plot represent median values. Mixed persistent-opportunistic records included combinations of species of the genera *Posidonia* and *Amphibolis, Thalassia* and *Syringodium*, or *Thalassia* and *Cymodocea*. Mixed colonizing records referred to cases where species from the genera *Halodule,* *Ruppia,* or *Halophila* were reported together. Different lower-case letters represent significant differences between coastal geomorphologies as a result of a Kruskal–Wallis Dunn's multiple comparison test with p < 0.05 adjusted using the Bonferroni procedure (p < α/2). Median OC burial rates do not exactly equal the product of median OC content and median MAR in the boxplots because medians are not multiplicative statistics, and OC content and MAR are skewed and covary across sites. Burial rates are computed for each individual core from its specific OC content and MAR, whereas the medians shown for OC and MAR represent marginal distributions that do not necessarily co-occur.

**
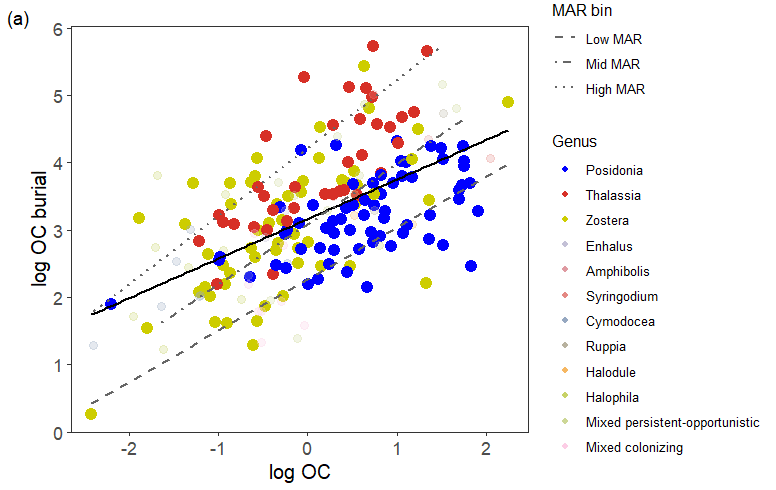
**

**Figure S3.** Log-log relationship of organic carbon (OC) burial and OC content in vegetated sediments. Individual observations are colored by seagrass genera, with *Posidonia, Thalassia* and *Zostera*, the dominant genus in the dataset colored bright. Mixed persistent-opportunistic records included combinations of species of the genera *Posidonia and Amphibolis, Thalassia* and *Syringodium*, or *Thalassia* and *Cymodocea*. Mixed colonizing records referred to cases where species from the genera *Halodule,* *Ruppia,* or *Halophila* were reported together. Dashed lines represent linear fits for each MAR quantile (0–25%, 25–75%, 75–100%) and the solid line represents the overall mean linear fit across all points (equation for mean fit shown in Fig. 4 in the main manuscript).

**
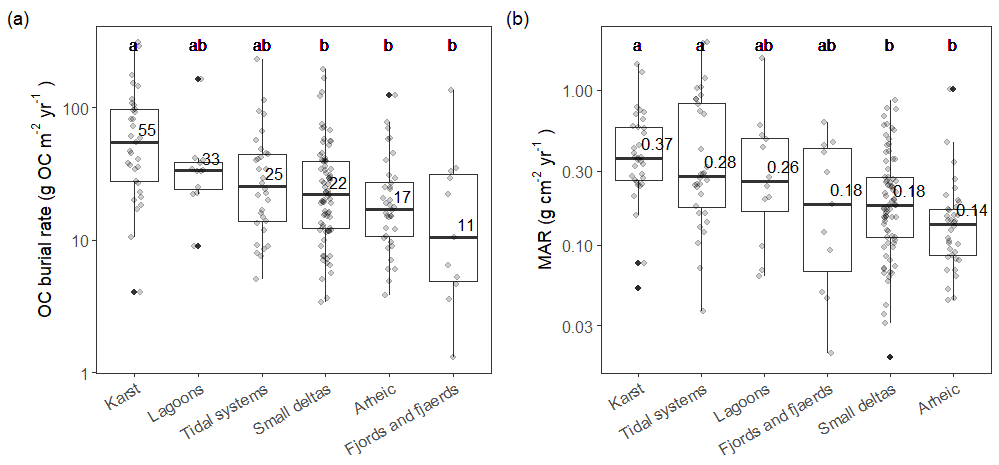
**

**Figure S4.** Organic carbon (OC) burial rates (a) and mass accumulation rates (b) in vegetated seagrass sediments with measurable accumulation grouped by coastal geomorphological categories in Dür et al. 2011. Different lower-case letters represent significant differences between coastal geomorphologies as a result of a Kruskal–Wallis Dunn's multiple comparison test with p < .05 adjusted using the Bonferroni procedure (p < α/2). Values on the box plot represent median values.


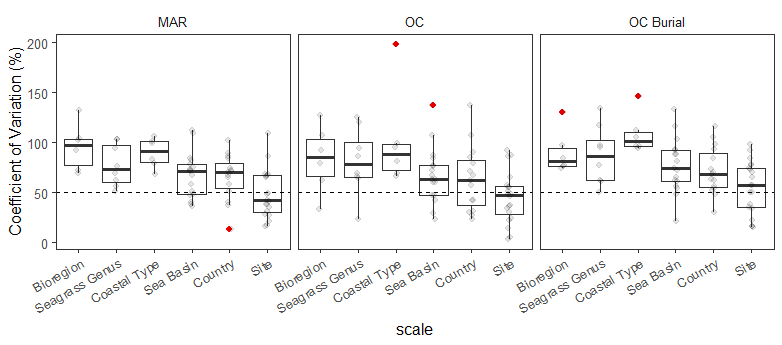


**Figure S5.** Coefficients of variation in organic carbon (OC) burial rates, mass accumulation rates, and OC content across different spatial scales. Boxes show the interquartile range, horizontal lines indicate the median, and whiskers extend to 1.5 times the IQR, individual data points are overlaid, red data points represent outliers.


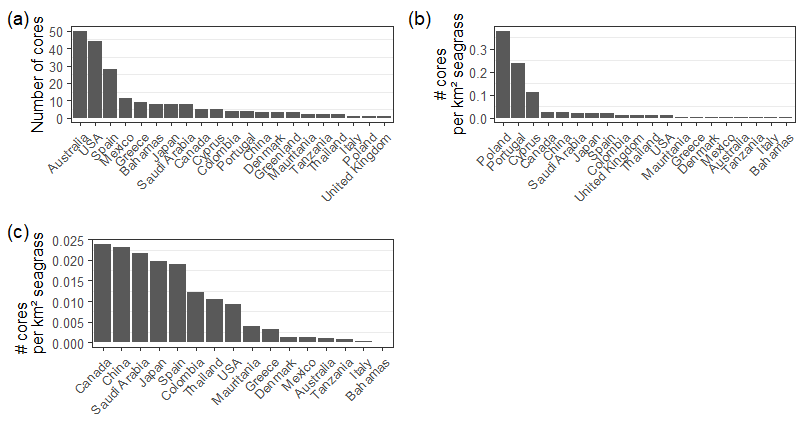


**Figure S6.** Number of cores in dataset. (a) Cores per country, (b) core per country normalized by mapped seagrass area, (c) core per country normalized by mapped area for countries with > 100 km2 of seagrass extent. Cores from Greenland (n = 3) were excluded from panel (c) due to the unknown seagrass area.

**Tables**

**Table S1**. Summary statistics for organic carbon burial rates (g OC m-2 yr-1) in vegetated seagrass sediments with net positive accumulation, grouped by bioregion.

| **Bioregion** | **n** | **Distribution** | **min** | **max** | **mean** | **SD** | **median** | **geom. mean** |
| --- | --- | --- | --- | --- | --- | --- | --- | --- |
| Mediterranean | 41 | log-normal | 3.40 | 75 | 27 | 21 | 20 | 20 |
| North Atlantic | 21 | log-normal | 1.30 | 230 | 44 | 57 | 20 | 22 |
| North Pacific | 32 |  | 4.63 | 976 | 55 | 169 | 22 | 22 |
| Southern Oceans | 50 | log-normal | 7.02 | 130 | 33 | 28 | 25 | 26 |
| Tropical Atlantic | 46 | log-normal | 4.00 | 309 | 72 | 70 | 39 | 47 |
| Tropical Indo-Pacific | 12 | log-normal | 3.80 | 45 | 15 | 12 | 13 | 12 |
| All | 203 | log-normal | 1.30 | 976 | 44 | 80 | 25 | 26 |

**Table S2.** Summary statistics for organic carbon (OC) content, mass accumulation rates (MAR), and OC burial rates in vegetated seagrass sediments with net positive accumulation binned by OC burial rate percentile ranges (0-25%, 25-75%,75-100%).

|  |  | **OC (%)** | | | | | **MAR (g cm-2 yr-1)** | | | | | **OC burial rate (g C m-2 yr-1)** | | | | |
| --- | --- | --- | --- | --- | --- | --- | --- | --- | --- | --- | --- | --- | --- | --- | --- | --- |
| **OC burial percentile bins** | **n** | **Min** | **Q1** | **Q2** | **Q3** | **Max** | **Min** | **Q1** | **Q2** | **Q3** | **Max** | **Min** | **Q1** | **Q2** | **Q3** | **Max** |
| Low (0-25%) | 51 | 0.09 | 0.33 | 0.54 | 0.79 | 6.30 | 0.02 | 0.09 | 0.16 | 0.26 | 0.62 | 1.3 | 6.0 | 8.5 | 11.1 | 13.4 |
| Intermediate (25-75%) | 100 | 0.15 | 0.67 | 1.19 | 1.93 | 6.80 | 0.04 | 0.11 | 0.21 | 0.36 | 2.04 | 13.5 | 19.1 | 25.0 | 33.7 | 42.0 |
| High (75-100%) | 51 | 0.19 | 1.64 | 2.29 | 3.65 | 9.45 | 0.05 | 0.18 | 0.35 | 0.69 | 2.01 | 43.8 | 56.4 | 75.0 | 118.9 | 308.7 |

**Table S3.** Parameters and their standard errors and statistics for the fitted quantile regression

equations between organic carbon (OC) content and sediment mass accumulation rates (MAR), and OC content and OC burial rate in Figure 4a and 4b, respectively.

| Function | Percentile bin | Intercept ± SE (a) | Slope ± SE (b) | p-value |
| --- | --- | --- | --- | --- |
| OC% = a·exp(b·MAR) | 0-25 | 3.0 ± 0.6 | -11 ± 3 | <0.001 |
| 25-75 | 5.6 ± 0.5 | -7.8 ± 0.8 | <0.0001 |
| 75-100 | 6.6 ± 07 | -2.6 ± 0.5 | <0.0001 |
| logOC burial = a + b·logOC | 0-25 | 2.27 ± 0.08 | 0.76 ± 0.07 | <0.0001 |
| 25-75 | 3.09 ± 0.04 | 0.91 ± 0.06 | <0.0001 |
| 75-100 | 4.25 ± 0.07 | 1.04 ± 0.07 | <0.0001 |

**Table S4**. Mapped seagrass area by country updated from McKenzie et al. 2020 (see supplementary spreadsheet file Table S4)

**Table S5.** Estimates of organic carbon (OC) burial rates in vegetated coastal habitats, and their relative contribution to OC burial in both the coastal and global ocean. Modified from Duarte et al.1, incorporating updated mapped area estimates2–4 and revised areal organic carbon burial rates for vegetated coastal ecosystem5,6 and updated global rates for the continental margin7, and the deep sea8.

| **Compartment** | **Area extent**  **mapped** | **OC Burial** | | | **Global OC burial** | |
| --- | --- | --- | --- | --- | --- | --- |
|  | **103 km2** | **g OC m-2 yr-1** | | | **Tg OC yr-1** | |
| *Vegetated coastal habitats* |  |  | |  |  |  |
| Mangroves | 822-1463 | 139 | | ± 18 | 11 ± 2 | 20 ± 3 |
| Tidal Marsh | 32-604 | 133a | | ± 8 | 4.3 ± 0.2 | 8.8 ± 0.5 |
| Seagrass | 248-366 | 33 | | ± 10 | 8 ± 2 | 12 ± 4 |
| Total vegetated habitats |  | 305 | | ± 22 | 23 ± 3 | 41 ± 5 |
| **% Seagrass** |  |  | |  | **35 ± 10** | **29 ± 10** |
|  |  |  | |  |  |  |
| *Depositional marine areas* |  | |  |  |  |  |
| Continental margin |  | |  |  | 2487 |  |
| Total coastal OC burial |  |  | |  | 271 ± 3 | 289 ± 5 |
|  |  |  | |  |  |  |
| *Deep Sea burial* |  |  | |  | 208 |  |
| Total oceanic OC burial |  |  | |  | 291 ± 3 | 309 ± 5 |
| **% Seagrass** (based on mapped area) |  |  | |  | **3 ± 1** | **4 ± 1** |

a Median OC burial rate from Wang et al. (2021) was used as the most appropriate measure of central tendency.

**References**

1. Duarte, C. M., Middelburg, J. J. & Caraco, N. Major role of marine vegetation on the oceanic carbon cycle. *Biogeosciences* 2, 1–8 (2005).

2. Hamilton, S. E. & Casey, D. Creation of a high spatio-temporal resolution global database of continuous mangrove forest cover for the 21st century (CGMFC-21). *Global Ecology and Biogeography* 25, 729–738 (2016).

3. Worthington, T. A. *et al.* A global biophysical typology of mangroves and its relevance for ecosystem structure and deforestation. *Sci Rep* 10, 1–11 (2020).

4. Worthington, T. A. *et al.* The distribution of global tidal marshes from Earth observation data. *Global Ecology and Biogeography* 33, 1–13 (2024).

5. Wang, F. *et al.* Global blue carbon accumulation in tidal wetlands increases with climate change. *Natl Sci Rev* 8, (2021).

6. Breithaupt, J. L. & Steinmuller, H. E. Refining the Global Estimate of Mangrove Carbon Burial Rates Using Sedimentary and Geomorphic Settings. *Geophys Res Lett* 49, (2022).

7. Burdige, D. J. Preservation of organic matter in marine sediments: Controls, mechanisms, and an imbalance in sediment organic carbon budgets? *Chem Rev* 107, 467–485 (2007).

8. Hayes, C. T. *et al.* Global Ocean Sediment Composition and Burial Flux in the Deep Sea. *Global Biogeochem Cycles* 35, 1–25 (2021).
